# Supplementary material for: Small Functional Foods: Comparative Phytochemical and Nutritional Analyses of Five Microgreens of the Brassicaceae Family
Source: PubMed Central journal article supplement (PMC7919663; doi:10.3390/foods10020427), 2021-02-15
Supplement: foods-10-00427-s001.pdf [file foods-10-00427-s001.pdf]

**Table S1.** Correlation between antioxidants content (total polyphenols and ascorbic acid content) in leaves of five Brassicaceae species (*B. oleracea*, *R. raphanistrum*, *B. juncea*, *E. vesicaria*, *N. officinale*) microgreens and their radical scavenger activity (DPPH assay, IC<sub>50</sub>).

| Species                           | Antioxidant         | Equation                | R <sup>2</sup> |
|-----------------------------------|---------------------|-------------------------|----------------|
| <i>B. oleracea</i> —Broccoli      | Total polyphenols   | $y = -1.7568x + 10.341$ | 0.6834         |
|                                   | Total ascorbic acid | $y = -34.611x + 7.9447$ | 0.9582         |
|                                   | Total anthocyanins  | $y = -0.0107x + 5.7968$ | 0.8988         |
|                                   | Total carotenoids   | $y = -0.028x + 6.4277$  | 0.9850         |
| <i>R. raphanistrum</i> —Daikon    | Total polyphenols   | $y = -2.6326x + 11.496$ | 0.9803         |
|                                   | Total ascorbic acid | $y = -70.15x + 9.6086$  | 0.7728         |
|                                   | Total anthocyanins  | $y = -0.0529x + 6.1427$ | 0.8057         |
|                                   | Total carotenoids   | $y = -0.0363x + 9.9407$ | 0.5326         |
| <i>B. juncea</i> —Mustard         | Total polyphenols   | $y = -7.715x + 18.755$  | 0.7582         |
|                                   | Total ascorbic acid | $y = -5.9945x + 14.504$ | 0.8981         |
|                                   | Total anthocyanins  | $y = -0.0062x + 13.742$ | 0.7273         |
|                                   | Total carotenoids   | $y = -0.1688x + 14.125$ | 0.7743         |
| <i>E. vesicaria</i> —Rocket salad | Total polyphenols   | $y = -4.0734x + 24.233$ | 0.8728         |
|                                   | Total ascorbic acid | $y = -135.81x + 15.624$ | 0.7324         |
|                                   | Total anthocyanins  | $y = -0.0551x + 14.035$ | 0.7427         |
|                                   | Total carotenoids   | $y = -0.0808x + 29.344$ | 0.9305         |
| <i>N. officinale</i> —Watercress  | Total polyphenols   | $y = -1.5374x + 9.284$  | 0.7404         |
|                                   | Total ascorbic acid | $y = -24.142x + 7.5931$ | 0.9422         |
|                                   | Total anthocyanins  | $y = -0.0466x + 6.3114$ | 0.8315         |
|                                   | Total carotenoids   | $y = -0.0737x + 11.359$ | 0.8633         |
